# Supplementary material for: Population Structure and Genetic Diversity Analysis in Sugarcane (Saccharum spp. hybrids) and Six Related Saccharum Species
Source: MDPI journal article supplement (doi:10.3390/agronomy12020412), 2022-02-06
Supplement: s1 [file s1]

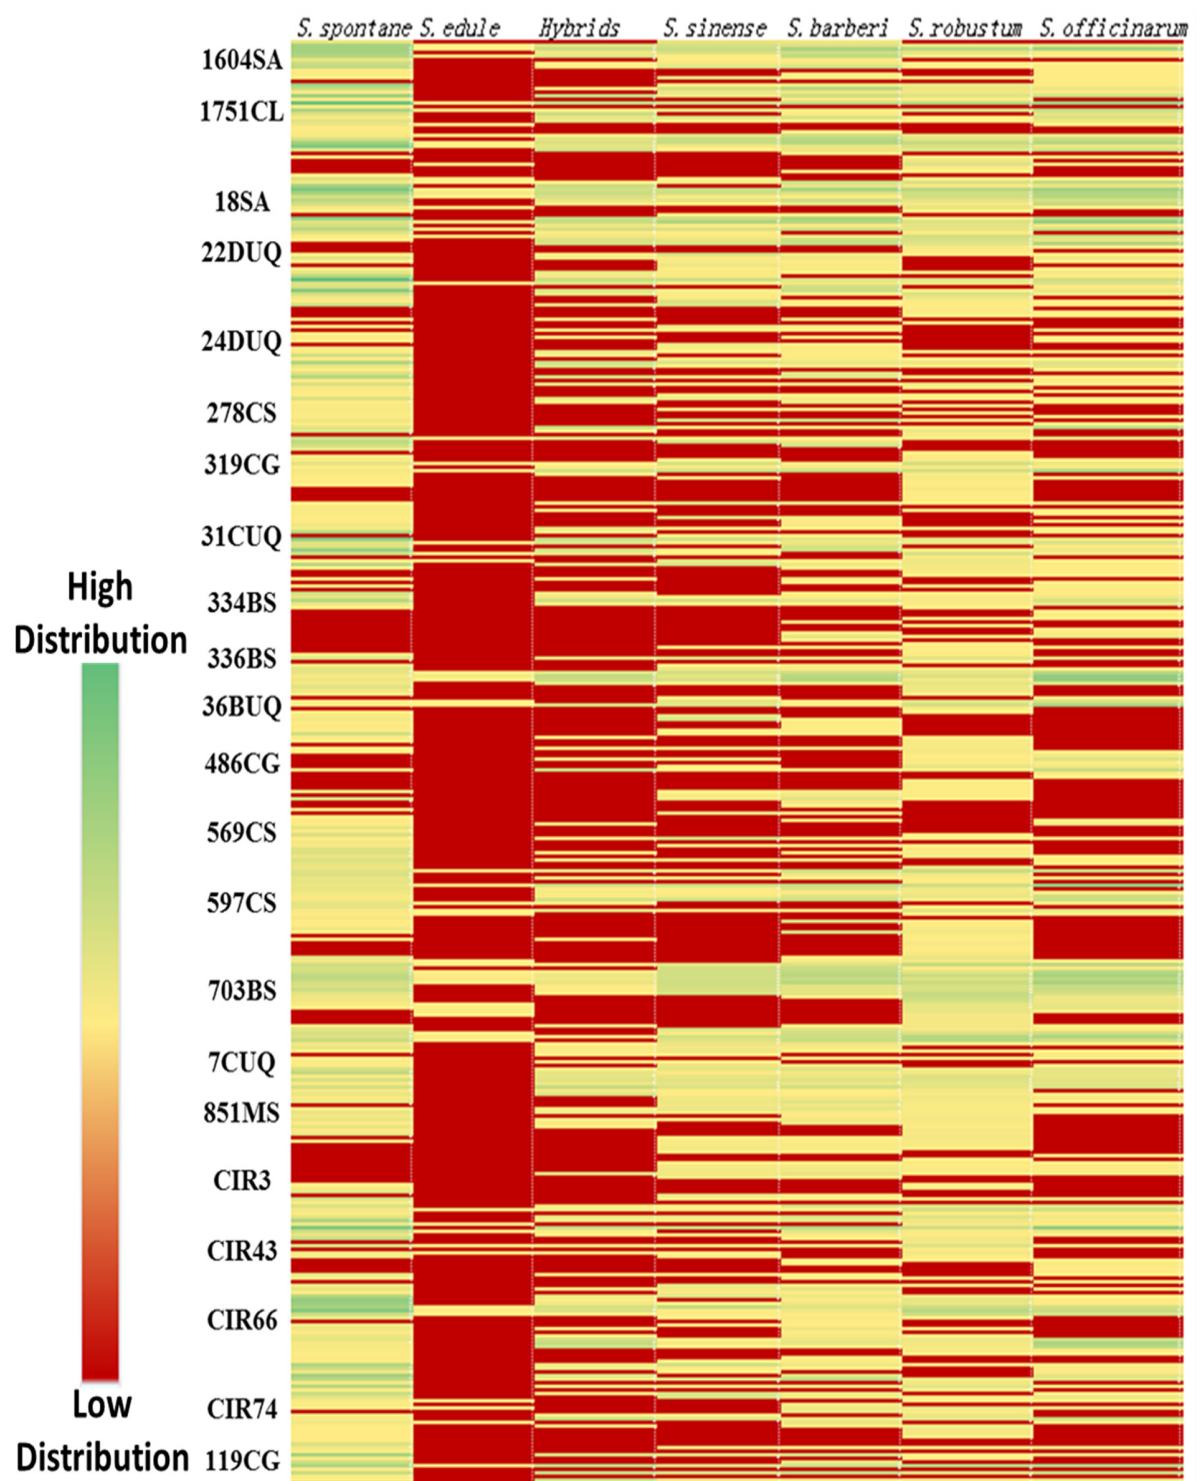

**Supplementary Figure S1.** Distribution of the 624 SSR alleles amplified with 22 pairs of SSR primers from *Saccharum* spp. hybrids and six related *Saccharum* species (*S. spontaneum*, *S. robustum*, *S. officinarum*, *S. sinense*, *S. barberi*, and *S. edule*). The degrees of the distribution were presented by color gradient from red (missing) to green (high).

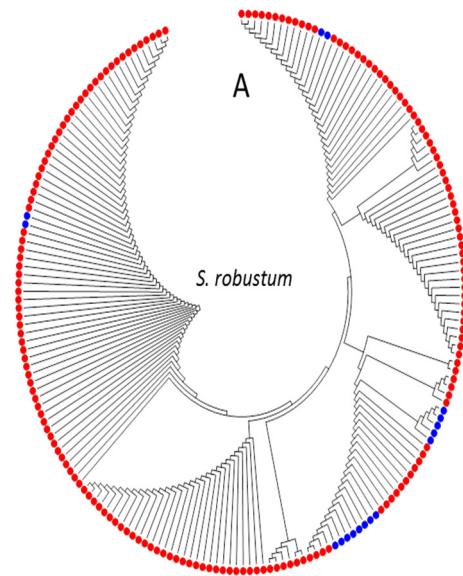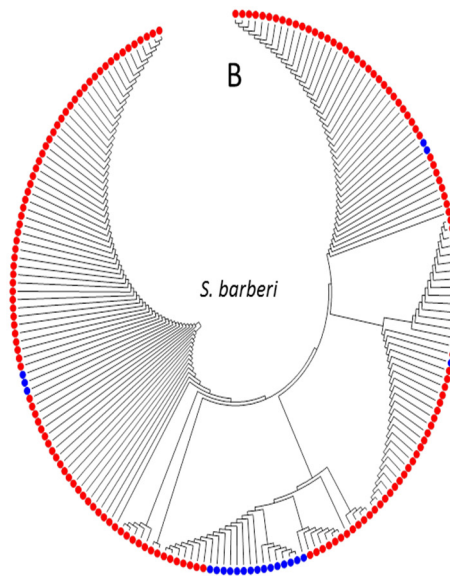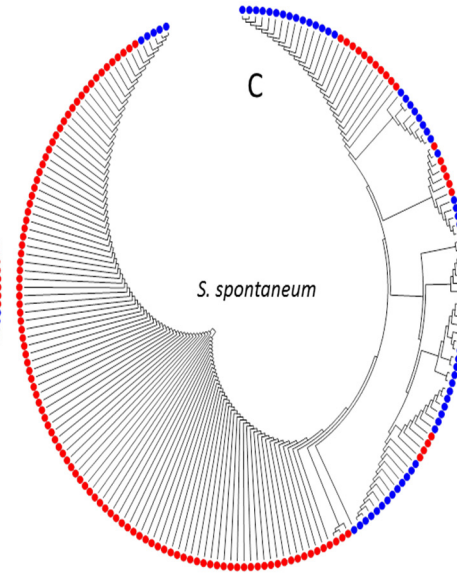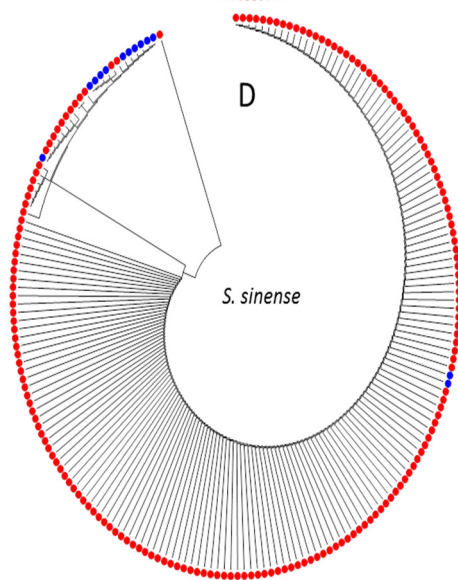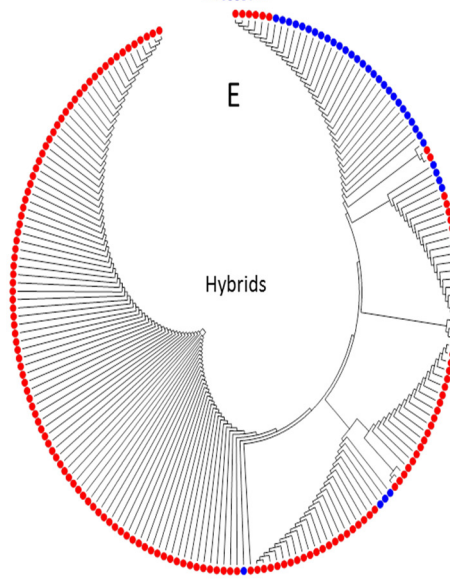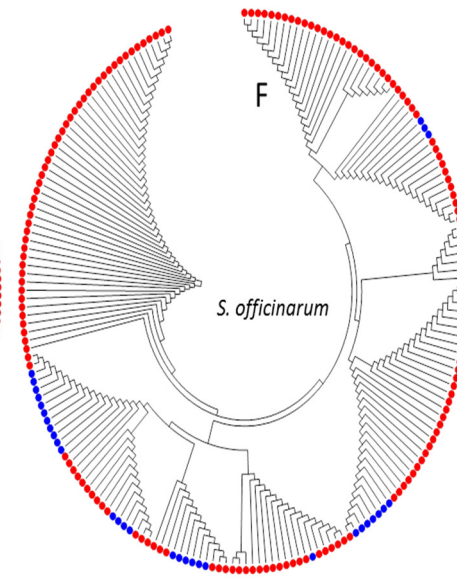

**Supplementary Figure S2.** Phylogenetic trees for six *Saccharum* species based on species-specific or species-associated SSR alleles: (A) *S. robustum* (5 alleles); (B) *S. barberi* (4 alleles), (C) *S. spontaneum* (4 alleles), (D) *S. sinense* (4 alleles), (E) Hybrids (3 alleles), (F) *S. officinarum* (4 alleles).

**Supplementary Table S1.** The information of 196 sugarcane accessions of *Saccharum* spp. hybrids and six related *Saccharum* species: *S. spontaneum*, *S. robustum*, *S. officinarum*, *S. sinense*, *S. barberi*, and *S. edule*.

| ID | Clone_ID         | Clone_name   | Species                     | abbr | 3-cluster | 8-CLUSTER |
|----|------------------|--------------|-----------------------------|------|-----------|-----------|
| 1  | Coimbatore_ssp   | Coimbatore   | <i>Saccharum spontaneum</i> | ssp  | Q1        | q7        |
| 2  | Dacca_ssp        | Dacca        | <i>Saccharum spontaneum</i> | ssp  | Q1        | q8(q7)    |
| 3  | Djatiroto_ssp    | Djatiroto    | <i>Saccharum spontaneum</i> | ssp  | Q1        | q7        |
| 4  | Glagah_ssp       | Glagah       | <i>Saccharum spontaneum</i> | ssp  | Q1        | q8        |
| 5  | Guangxi86-5_ssp  | Guangxi86-5  | <i>Saccharum spontaneum</i> | ssp  | Q1        | q7        |
| 6  | Guangxi87-21_ssp | Guangxi87-21 | <i>Saccharum spontaneum</i> | ssp  | Q1        | q7        |
| 7  | Guangxi87-22_ssp | Guangxi87-22 | <i>Saccharum spontaneum</i> | ssp  | Q1        | q7        |
| 8  | IMP9068_ssp      | IMP9068      | <i>Saccharum spontaneum</i> | ssp  | Q1        | q7        |
| 9  | IMP9089_ssp      | IMP9089      | <i>Saccharum spontaneum</i> | ssp  | Q1        | q7        |
| 10 | IN76-086_ssp     | IN76-086     | <i>Saccharum spontaneum</i> | ssp  | Q1        | q8        |
| 11 | IN84-010_ssp     | IN84-010     | <i>Saccharum spontaneum</i> | ssp  | Q1        | q7        |
| 12 | IN84-033_ssp     | IN84-033     | <i>Saccharum spontaneum</i> | ssp  | Q1        | q8        |
| 13 | IN84-089_ssp     | IN84-089     | <i>Saccharum spontaneum</i> | ssp  | Q1        | q8        |
| 14 | IND_81-165_ssp   | IND81-165    | <i>Saccharum spontaneum</i> | ssp  | Q1        | q7        |
| 15 | IND81-043_ssp    | IND81-043    | <i>Saccharum spontaneum</i> | ssp  | Q1        | q8        |
| 16 | IND81-080_ssp    | IND81-080    | <i>Saccharum spontaneum</i> | ssp  | Q1        | q7        |
| 17 | IND81-101_ssp    | IND81-101    | <i>Saccharum spontaneum</i> | ssp  | Q1        | q8        |
| 18 | IND81-142_ssp    | IND81-142    | <i>Saccharum spontaneum</i> | ssp  | Q1        | q7        |
| 19 | IND81-144_ssp    | IND81-144    | <i>Saccharum spontaneum</i> | ssp  | Q1        | q7        |
| 20 | IND81-155_ssp    | IND81-155    | <i>Saccharum spontaneum</i> | ssp  | Q1        | q7        |
| 21 | IND81-161_ssp    | IND81-161    | <i>Saccharum spontaneum</i> | ssp  | Q1        | q7        |
| 22 | IND82-257A_ssp   | IND82-257A   | <i>Saccharum spontaneum</i> | ssp  | Q1        | q7        |
| 23 | IND82-31_ssp     | IND82-31     | <i>Saccharum spontaneum</i> | ssp  | Q1        | q7        |
| 24 | IS76-121_ssp     | IS76-121     | <i>Saccharum spontaneum</i> | ssp  | Q1        | q8        |
| 25 | IS76-137_ssp     | IS76-137     | <i>Saccharum spontaneum</i> | ssp  | Q1        | q8        |
| 26 | Isiolo_ssp       | Isiolo       | <i>Saccharum spontaneum</i> | ssp  | Q1        | q7        |

|    |                  |              |                             |     |    |      |
|----|------------------|--------------|-----------------------------|-----|----|------|
| 27 | MMoentai_ssp     | MMoentai     | <i>Saccharum spontaneum</i> | ssp | Q1 | q8   |
| 28 | Mol1032A_ssp     | Mol1032A     | <i>Saccharum spontaneum</i> | ssp | Q1 | q7   |
| 29 | Mol1032B_ssp     | Mol1032B     | <i>Saccharum spontaneum</i> | ssp | Q1 | q7   |
| 30 | Mpth97-107_ssp   | Mpth97-107   | <i>Saccharum spontaneum</i> | ssp | Q1 | q7   |
| 31 | Mpth97-204_ssp   | Mpth97-204   | <i>Saccharum spontaneum</i> | ssp | Q1 | q7   |
| 32 | Mpth97-209_ssp   | Mpth97-209   | <i>Saccharum spontaneum</i> | ssp | Q1 | q7   |
| 33 | Mpth97-213_ssp   | Mpth97-213   | <i>Saccharum spontaneum</i> | ssp | Q1 | q7   |
| 34 | Mpth97-216_ssp   | Mpth97-216   | <i>Saccharum spontaneum</i> | ssp | Q1 | q7   |
| 35 | Mpth97-233_ssp   | Mpth97-233   | <i>Saccharum spontaneum</i> | ssp | Q1 | q7   |
| 36 | Mpth97-3_ssp     | Mpth97-3     | <i>Saccharum spontaneum</i> | ssp | Q1 | q7   |
| 37 | NG77-169_ssp     | NG77-169     | <i>Saccharum spontaneum</i> | ssp | Q1 | q8   |
| 38 | Okinawa#01_ssp   | Okinawa#01   | <i>Saccharum spontaneum</i> | ssp | Q1 | q8   |
| 39 | PCA-NOR84-2A_ssp | PCA-NOR84-2A | <i>Saccharum spontaneum</i> | ssp | Q1 | q7   |
| 40 | PCAV84-12A_ssp   | PCAV84-12A   | <i>Saccharum spontaneum</i> | ssp | Q1 | q7   |
| 41 | PCAV84-12B_ssp   | PCAV84-12B   | <i>Saccharum spontaneum</i> | ssp | Q1 | q7   |
| 42 | PCAV84-12C_ssp   | PCAV84-12C   | <i>Saccharum spontaneum</i> | ssp | Q1 | q7   |
| 43 | PIN84-1B_ssp     | PIN84-1B     | <i>Saccharum spontaneum</i> | ssp | Q1 | q7   |
| 44 | PPGN84-08_ssp    | PPGN84-08    | <i>Saccharum spontaneum</i> | ssp | Q1 | q8   |
| 45 | PQ84-3_ssp       | PQ84-3       | <i>Saccharum spontaneum</i> | ssp | Q1 | q7   |
| 46 | S001_ssp         | S001         | <i>Saccharum spontaneum</i> | ssp | Q1 | q8   |
| 47 | S66-084A_ssp     | S66-084A     | <i>Saccharum spontaneum</i> | ssp | Q1 | q7   |
| 48 | S66-084B_ssp     | S66-084B     | <i>Saccharum spontaneum</i> | ssp | Q1 | q7   |
| 49 | S66-121A_ssp     | S66-121A     | <i>Saccharum spontaneum</i> | ssp | Q1 | q7   |
| 50 | SaudiArabia_ssp  | SaudiArabia  | <i>Saccharum spontaneum</i> | ssp | Q1 | q8q7 |
| 51 | SES006_ssp       | SES006       | <i>Saccharum spontaneum</i> | ssp | Q1 | q7   |
| 52 | SES084-58_ssp    | SES084-58    | <i>Saccharum spontaneum</i> | ssp | Q1 | q7   |
| 53 | SES114_ssp       | SES114       | <i>Saccharum spontaneum</i> | ssp | Q1 | q7   |
| 54 | SES147B_ssp      | SES147B      | <i>Saccharum spontaneum</i> | ssp | Q1 | q7   |
| 55 | SES189_ssp       | SES189       | <i>Saccharum spontaneum</i> | ssp | Q1 | q7   |
| 56 | SES205A_ssp      | SES205A      | <i>Saccharum spontaneum</i> | ssp | Q1 | q7   |
| 57 | SES231_ssp       | SES231       | <i>Saccharum spontaneum</i> | ssp | Q1 | q7   |
| 58 | SES234A_ssp      | SES234A      | <i>Saccharum spontaneum</i> | ssp | Q1 | q7   |

|    |                    |                |                             |     |        |        |
|----|--------------------|----------------|-----------------------------|-----|--------|--------|
| 59 | SES234B_ssp        | SES234B        | <i>Saccharum spontaneum</i> | ssp | Q1     | q7     |
| 60 | SES297B_ssp        | SES297B        | <i>Saccharum spontaneum</i> | ssp | Q1     | q8     |
| 61 | SES323A_ssp        | SES323A        | <i>Saccharum spontaneum</i> | ssp | Q1     | q7     |
| 62 | SH249_ssp          | SH249          | <i>Saccharum spontaneum</i> | ssp | Q1     | q7     |
| 63 | SM7916_ssp         | SM7916         | <i>Saccharum spontaneum</i> | ssp | Q3Q2   | q8     |
| 64 | sspT17_ssp         | sspT17         | <i>Saccharum spontaneum</i> | ssp | Q1     | q7     |
| 65 | sspT24_ssp         | sspT24         | <i>Saccharum spontaneum</i> | ssp | Q1     | q7     |
| 66 | sspT37_ssp         | sspT37         | <i>Saccharum spontaneum</i> | ssp | Q1     | q7     |
| 67 | SSpontPakistan_ssp | SSpontPakistan | <i>Saccharum spontaneum</i> | ssp | Q1     | q7     |
| 68 | TAINNAN_ssp        | TAINNAN        | <i>Saccharum spontaneum</i> | ssp | Q1     | q7     |
| 69 | US56-013-07_ssp    | US56-013-07    | <i>Saccharum spontaneum</i> | ssp | Q1     | q7     |
| 70 | ChukChe_ssi        | ChukChe        | <i>Saccharum sinense</i>    | ssi | Q2     | q3     |
| 71 | Katha_ssi          | Katha          | <i>Saccharum sinense</i>    | ssi | Q3     | q1     |
| 72 | Khakai_ssi         | Khakai         | <i>Saccharum sinense</i>    | ssi | Q3     | q4     |
| 73 | LuCane_ssi         | LuCane         | <i>Saccharum sinense</i>    | ssi | Q3Q2   | q2     |
| 74 | Mcikum_ssi         | Mcikum         | <i>Saccharum sinense</i>    | ssi | Q2     | q3     |
| 75 | Merthi_ssi         | Merthi         | <i>Saccharum sinense</i>    | ssi | Q2     | q3     |
| 76 | MiaLan_ssi         | MiaLan         | <i>Saccharum sinense</i>    | ssi | Q2     | q3     |
| 77 | Nepal3_ssi         | Nepal3         | <i>Saccharum sinense</i>    | ssi | Q2     | q3     |
| 78 | TanzhonBamboo_ssi  | TanzhonBamboo  | <i>Saccharum sinense</i>    | ssi | Q2     | q3     |
| 79 | TekchaOkinawa_ssi  | TekchaOkinawa  | <i>Saccharum sinense</i>    | ssi | Q2     | q3     |
| 80 | UbaDelNatal_ssi    | UbaDelNatal    | <i>Saccharum sinense</i>    | ssi | Q2     | q3     |
| 81 | UbaIndia_ssi       | UbaIndia       | <i>Saccharum sinense</i>    | ssi | Q2     | q3     |
| 82 | UbaNaquin_ssi      | UbaNaquin      | <i>Saccharum sinense</i>    | ssi | Q2     | q3     |
| 83 | IJ76-339_sr        | IJ76-339       | <i>Saccharum robustum</i>   | sr  | Q3     | q6     |
| 84 | IJ76-534_sr        | IJ76-534       | <i>Saccharum robustum</i>   | sr  | Q1     | q6     |
| 85 | IM76-232_sr        | IM76-232       | <i>Saccharum robustum</i>   | sr  | Q1     | q8q7q6 |
| 86 | IN84-045_sr        | IN84-045       | <i>Saccharum robustum</i>   | sr  | Q3     | q6     |
| 87 | IN84-076_sr        | IN84-076       | <i>Saccharum robustum</i>   | sr  | Q1     | q6     |
| 88 | M3035-66_sr        | M3035-66       | <i>Saccharum robustum</i>   | sr  | Q3     | q4     |
| 89 | NG28-289_sr        | NG28-289       | <i>Saccharum robustum</i>   | sr  | Q1Q2Q3 | q6     |
| 90 | NG57-055_sr        | NG57-055       | <i>Saccharum robustum</i>   | sr  | Q1     | q6     |

|     |                    |                 |                           |    |    |        |
|-----|--------------------|-----------------|---------------------------|----|----|--------|
| 91  | NG77-021_sr        | NG77-021        | <i>Saccharum robustum</i> | sr | Q3 | q6     |
| 92  | NG77-084_sr        | NG77-084        | <i>Saccharum robustum</i> | sr | Q3 | q6     |
| 93  | NG77-147_sr        | NG77-147        | <i>Saccharum robustum</i> | sr | Q3 | q6     |
| 94  | NG77-159_sr        | NG77-159        | <i>Saccharum robustum</i> | sr | Q3 | q6     |
| 95  | NG77-235A_sr       | NG77-235A       | <i>Saccharum robustum</i> | sr | Q3 | q6     |
| 96  | NG77-235_sr        | NG77-235        | <i>Saccharum robustum</i> | sr | Q3 | q6     |
| 97  | NH70-015_sr        | NH70-015        | <i>Saccharum robustum</i> | sr | Q2 | q4q3   |
| 98  | TeboeSalakToewa_sr | TeboeSalakToewa | <i>Saccharum robustum</i> | sr | Q3 | q6     |
| 99  | US57-141-05_sr     | US57-141-05     | <i>Saccharum robustum</i> | sr | Q3 | q6     |
| 100 | IJ76-375_se        | IJ76-375        | <i>Saccharum edule</i>    | se | Q3 | q6     |
| 101 | NG77-010_se        | NG77-010        | <i>Saccharum edule</i>    | se | Q3 | q6     |
| 102 | Agoule_sb          | Agoule          | <i>Saccharum barberi</i>  | sb | Q2 | q5     |
| 103 | Chin_sb            | Chin            | <i>Saccharum barberi</i>  | sb | Q2 | q3     |
| 104 | Chunnee_sb         | Chunnee         | <i>Saccharum barberi</i>  | sb | Q2 | q3     |
| 105 | DarkPindaria_sb    | DarkPindaria    | <i>Saccharum barberi</i>  | sb | Q2 | q3     |
| 106 | Dhaura_sb          | Dhaura          | <i>Saccharum barberi</i>  | sb | Q2 | q5     |
| 107 | Ganapathy_sb       | Ganapathy       | <i>Saccharum barberi</i>  | sb | Q2 | q5     |
| 108 | Hatuni_sb          | Hatuni          | <i>Saccharum barberi</i>  | sb | Q1 | q2     |
| 109 | Henja_sb           | Henja           | <i>Saccharum barberi</i>  | sb | Q3 | q1     |
| 110 | HulluKabbu_sb      | HulluKabbu      | <i>Saccharum barberi</i>  | sb | Q2 | q5     |
| 111 | Kalari_sb          | Kalari          | <i>Saccharum barberi</i>  | sb | Q2 | q3q1q7 |
| 112 | Keari_sb           | Keari           | <i>Saccharum barberi</i>  | sb | Q2 | q3     |
| 113 | Khagzi_sb          | Khagzi          | <i>Saccharum barberi</i>  | sb | Q1 | q7(q5) |
| 114 | MangaSic_sb        | MangaSic        | <i>Saccharum barberi</i>  | sb | Q1 | q2     |
| 115 | Matna_Shahj_sb     | Matna.Shahj     | <i>Saccharum barberi</i>  | sb | Q1 | q2     |
| 116 | Nargori.1_sb       | Nargori.1       | <i>Saccharum barberi</i>  | sb | Q1 | q2     |
| 117 | Nargori_sb         | Nargori         | <i>Saccharum barberi</i>  | sb | Q1 | q2     |
| 118 | NEWRA_sb           | NEWRA           | <i>Saccharum barberi</i>  | sb | Q1 | q2     |
| 119 | Pathri_sb          | Pathri          | <i>Saccharum barberi</i>  | sb | Q2 | q5     |
| 120 | Paunra_sb          | Paunra          | <i>Saccharum barberi</i>  | sb | Q2 | q5     |
| 121 | Rounda_sb          | Rounda          | <i>Saccharum barberi</i>  | sb | Q2 | q5     |
| 122 | Ruckri_sb          | Ruckri          | <i>Saccharum barberi</i>  | sb | Q2 | q5     |

|     |                      |                   |                              |    |       |      |
|-----|----------------------|-------------------|------------------------------|----|-------|------|
| 123 | Semari_sb            | Semari            | <i>Saccharum barberi</i>     | sb | Q3    | q8q4 |
| 124 | Sunnabile_sb         | Sunnabile         | <i>Saccharum barberi</i>     | sb | Q2    | q5   |
| 125 | Terenu_sb            | Terenu            | <i>Saccharum barberi</i>     | sb | Q2    | q5   |
| 126 | WhitePararia_sb      | WhitePararia      | <i>Saccharum barberi</i>     | sb | Q2    | q5   |
| 127 | Akoki24_so           | Akoki24           | <i>Saccharum officinarum</i> | so | Q3    | q4   |
| 128 | BadilaFiji_so        | BadilaFiji        | <i>Saccharum officinarum</i> | so | Q3    | q4   |
| 129 | BadilaJava_so        | BadilaJava        | <i>Saccharum officinarum</i> | so | Q3    | q4   |
| 130 | Badilla_so           | Badilla           | <i>Saccharum officinarum</i> | so | Q3    | q4   |
| 131 | BandjermasinHitam_so | BandjermasinHitam | <i>Saccharum officinarum</i> | so | Q3    | q4   |
| 132 | BigRibbon_so         | BigRibbon         | <i>Saccharum officinarum</i> | so | Q3    | q4   |
| 133 | EK02_so              | EK02              | <i>Saccharum officinarum</i> | so | Q3    | q4   |
| 134 | Fiji1_so             | Fiji1             | <i>Saccharum officinarum</i> | so | Q3    | q1   |
| 135 | Fiji24_so            | Fiji24            | <i>Saccharum officinarum</i> | so | Q3    | q4   |
| 136 | Fiji47_so            | Fiji47            | <i>Saccharum officinarum</i> | so | Q3    | q4q1 |
| 137 | Green_German.1_so    | GreenGerman.1     | <i>Saccharum officinarum</i> | so | Q3    | q1   |
| 138 | GreenGerman_so       | GreenGerman       | <i>Saccharum officinarum</i> | so | Q3    | q1   |
| 139 | HawOrig36_so         | HawOrig36         | <i>Saccharum officinarum</i> | so | Q3    | q4   |
| 140 | IJ76-418B_so         | IJ76-418B         | <i>Saccharum officinarum</i> | so | Q3    | q4   |
| 141 | IJ76-521_so          | IJ76-521          | <i>Saccharum officinarum</i> | so | Q3    | q1   |
| 142 | IM76-245_so          | IM76-245          | <i>Saccharum officinarum</i> | so | Q3    | q4   |
| 143 | IN84-024_so          | IN84-024          | <i>Saccharum officinarum</i> | so | Q3    | q4   |
| 144 | IN84-068A_so         | IN84-068A         | <i>Saccharum officinarum</i> | so | Q3    | q1   |
| 145 | IN84-068B_so         | IN84-068B         | <i>Saccharum officinarum</i> | so | Q3    | q1   |
| 146 | LA_Purple_so         | LA.Purple         | <i>Saccharum officinarum</i> | so | Q3    | q1   |
| 147 | LA_Stripe_so         | LA.Stripe         | <i>Saccharum officinarum</i> | so | Q3    | q4   |
| 148 | LouisianaPurple_so   | LouisianaPurple   | <i>Saccharum officinarum</i> | so | Q3    | q4   |
| 149 | Mentor4745_so        | Mentor4745        | <i>Saccharum officinarum</i> | so | Q3    | q1   |
| 150 | MUNTOKJAVA_so        | MUNTOKJAVA        | <i>Saccharum officinarum</i> | so | Q1(3) | q1q7 |
| 151 | NG21-003_so          | NG21-003          | <i>Saccharum officinarum</i> | so | Q3    | q4   |
| 152 | NG21-017_so          | NG21-017          | <i>Saccharum officinarum</i> | so | Q3    | q4   |
| 153 | NG57-223_so          | NG57-223          | <i>Saccharum officinarum</i> | so | Q3    | q4   |
| 154 | NG77-066_so          | NG77-066          | <i>Saccharum officinarum</i> | so | Q3    | q4   |



|     |                 |             |                               |     |      |      |
|-----|-----------------|-------------|-------------------------------|-----|------|------|
| 155 | NG77-142_so     | NG77-142    | <i>Saccharum officinarum</i>  | so  | Q3   | q4   |
| 156 | NG77-241_so     | NG77-241    | <i>Saccharum officinarum</i>  | so  | Q3   | q6   |
| 157 | NG96-024_so     | NG96-024    | <i>Saccharum officinarum</i>  | so  | Q3   | q4   |
| 158 | NH70-069_so     | NH70-069    | <i>Saccharum officinarum</i>  | so  | Q3   | q4   |
| 159 | OI_DENG_so      | OI.DENG     | <i>Saccharum officinarum</i>  | so  | Q3   | q1   |
| 160 | Saipan_so       | Saipan      | <i>Saccharum officinarum</i>  | so  | Q3   | q4   |
| 161 | CP00-1101Hyb    | CP00-1101   | <i>Saccharum spp. hybrids</i> | Hyb | Q3   | q1   |
| 162 | CP72-1210Hyb    | CP72-1210   | <i>Saccharum spp. hybrids</i> | Hyb | Q3   | q1   |
| 163 | CP80-1743Hyb    | CP80-1743   | <i>Saccharum spp. hybrids</i> | Hyb | Q3   | q1   |
| 164 | CP88-1762Hyb    | CP88-1762   | <i>Saccharum spp. hybrids</i> | Hyb | Q3   | q1   |
| 165 | CP89-2143Hyb    | CP89-2143   | <i>Saccharum spp. hybrids</i> | Hyb | Q3   | q1   |
| 166 | Cuba_Hyb        | Cuba        | <i>Saccharum spp. hybrids</i> | Hyb | Q3   | q1   |
| 167 | H095-988Hyb     | H095-988    | <i>Saccharum spp. hybrids</i> | Hyb | Q3   | q1   |
| 168 | H78-4153Hyb     | H78-4153    | <i>Saccharum spp. hybrids</i> | Hyb | Q1Q3 | q4q7 |
| 169 | HoCP00950A_Hyb  | HoCP00950A  | <i>Saccharum spp. hybrids</i> | Hyb | Q3   | q1   |
| 170 | HoCP00-950Hyb   | HoCP00950   | <i>Saccharum spp. hybrids</i> | Hyb | Q3   | q1   |
| 171 | HoCP01-517_Hyb  | HoCP01-517  | <i>Saccharum spp. hybrids</i> | Hyb | Q3   | q1   |
| 172 | HoCP85-845_Hyb  | HoCP85-845  | <i>Saccharum spp. hybrids</i> | Hyb | Q3   | q1   |
| 173 | HoCP91-555Hyb   | HoCP91-555  | <i>Saccharum spp. hybrids</i> | Hyb | Q3   | q1   |
| 174 | HoCP96-540A_Hyb | HoCP96-540A | <i>Saccharum spp. hybrids</i> | Hyb | Q3   | q1   |
| 175 | HoCP96-540Hyb   | HoCP96-540  | <i>Saccharum spp. hybrids</i> | Hyb | Q3   | q1   |
| 176 | L00-268Hyb      | L00-268     | <i>Saccharum spp. hybrids</i> | Hyb | Q3   | q1   |
| 177 | L01-283_Hyb     | L01-283     | <i>Saccharum spp. hybrids</i> | Hyb | Q3   | q1   |
| 178 | L01-299_Hyb     | L01-299     | <i>Saccharum spp. hybrids</i> | Hyb | Q3   | q1   |
| 179 | L97-128Hyb      | L97-128     | <i>Saccharum spp. hybrids</i> | Hyb | Q3   | q1   |
| 180 | L98-207Hyb      | L98-207     | <i>Saccharum spp. hybrids</i> | Hyb | Q3   | q1   |
| 181 | L99-226Hyb      | L99-226     | <i>Saccharum spp. hybrids</i> | Hyb | Q3   | q1   |
| 182 | L99-233_Hyb     | L99-233     | <i>Saccharum spp. hybrids</i> | Hyb | Q3   | q1   |
| 183 | LCP85-384Hyb    | LCP85-384   | <i>Saccharum spp. hybrids</i> | Hyb | Q3   | q1   |
| 184 | MEX85-6196_Hyb  | MEX85-6196  | <i>Saccharum spp. hybrids</i> | Hyb | Q3   | q1   |
| 185 | N21_Hyb         | N21         | <i>Saccharum spp. hybrids</i> | Hyb | Q3   | q1   |
| 186 | N27_Hyb         | N27         | <i>Saccharum spp. hybrids</i> | Hyb | Q3   | q1   |

|     |                 |             |                               |     |    |    |
|-----|-----------------|-------------|-------------------------------|-----|----|----|
| 187 | TCP93-4245Hyb   | TCP93-4245  | <i>Saccharum spp. hybrids</i> | Hyb | Q3 | q1 |
| 188 | TCP97-4442A_Hyb | TCP97-4442A | <i>Saccharum spp. hybrids</i> | Hyb | Q3 | q1 |
| 189 | TCP97-4442Hyb   | TCP97-4442  | <i>Saccharum spp. hybrids</i> | Hyb | Q3 | q1 |
| 190 | TCP98-4445_Hyb  | TCP98-4445  | <i>Saccharum spp. hybrids</i> | Hyb | Q3 | q1 |
| 191 | TCP98-4447_Hyb  | TCP98-4447  | <i>Saccharum spp. hybrids</i> | Hyb | Q3 | q1 |
| 192 | TucCP77-42_Hyb  | TucCP77-42  | <i>Saccharum spp. hybrids</i> | Hyb | Q3 | q1 |
| 193 | TX98-4447Hyb    | TX98-4447   | <i>Saccharum spp. hybrids</i> | Hyb | Q3 | q1 |
| 194 | US01-39_Hyb     | US01-39     | <i>Saccharum spp. hybrids</i> | Hyb | Q3 | q1 |
| 195 | US01-40_Hyb     | US01-40     | <i>Saccharum spp. hybrids</i> | Hyb | Q3 | q1 |
| 196 | US02-99_Hyb     | US02-99     | <i>Saccharum spp. hybrids</i> | Hyb | Q3 | q1 |

---
